# Supplementary material for: Barriers to Video Call–Based Telehealth in Allied Health Professions and Nursing: Scoping Review and Mapping Process
Source: PubMed Central journal article supplement (PMC10427933; doi:10.2196/46715), 2023-08-01
Supplement: jmir_v25i1e46715_app1.pdf [file jmir_v25i1e46715_app1.pdf]

### **Pubmed on 2022 June 22**

(teleconsultation [tiab] OR "tele-consultation" [tiab] OR telehealth [tiab] OR "tele-health" [tiab] OR teleintervention [tiab] OR "tele-intervention" [tiab] OR telemedicine [tiab] OR "tele-medicine" [tiab] OR telerehabilitation [tiab] OR "tele-rehabilitation" [tiab] OR teletherapy [tiab] OR "tele-therapy" [tiab] OR telepractice [tiab] OR "tele-practice" [tiab] OR telecare [tiab] OR "tele-care"[tiab] OR "online-therapy" [tiab] OR teleconf\* OR video-call\* OR video-conf\*) AND (barrier\* [tiab] OR challenge\*[tiab]) AND (Dieti\* [tiab] OR nutritionist\* [tiab] OR audiolog\* [tiab] OR nurs\* [tiab] OR midwi\* [tiab] OR orthopt\* [tiab] OR "physical therap\*" [tiab] OR "physiotherap\*" [tiab] OR "occupational therap\*" [tiab] OR "speech therap\*" [tiab] OR "language therap\*" [tiab] OR "speech and language therapist\*" [tiab] OR "allied health professionals"[tiab]) AND (interview\* OR "focus group\*" OR survey\* OR questionnaire\*)

*Filter: last 5 years*

### **Cinahl on 2022 June 22**

(teleconsultation OR "tele-consultation" OR telehealth OR "tele-health" OR teleintervention OR "tele-intervention" OR telemedicine OR "tele-medicine" OR telerehabilitation OR "tele-rehabilitation" OR teletherapy OR "tele-therapy" OR telepractice OR "tele-practice" OR telecare OR "tele-care" OR "online-therapy" OR teleconf\* OR video-call\* OR video-conf\*) AND (barrier\* OR challenge\*) AND (Dieti\* OR nutritionist\* OR audiolog\* OR nurs\* OR midwi\* OR orthopt\* OR "physical therap\*" OR "physiotherap\*" OR "occupational therap\*" OR "speech therap\*" OR "language therap\*" OR "speech and language therapist\*" OR "allied health professionals") AND (interview\* OR "focus group\*" OR survey\* OR questionnaire\*)

*Filter: 06/2017-06-2022*

### **Pubmed on 2023 January 03**

(teleconsultation [tiab] OR "tele-consultation" [tiab] OR telehealth [tiab] OR "tele-health" [tiab] OR teleintervention [tiab] OR "tele-intervention" [tiab] OR telemedicine [tiab] OR "tele-medicine" [tiab] OR telerehabilitation [tiab] OR "tele-rehabilitation" [tiab] OR teletherapy [tiab] OR "tele-therapy" [tiab] OR telepractice [tiab] OR "tele-practice" [tiab] OR telecare [tiab] OR "tele-care"[tiab] OR "online-therapy" [tiab] OR teleconf\* OR video-call\* OR video-conf\*) AND (barrier\* [tiab] OR challenge\*[tiab]) AND (Dieti\* [tiab] OR nutritionist\* [tiab] OR audiolog\* [tiab] OR nurs\* [tiab] OR midwi\* [tiab] OR orthopt\* [tiab] OR "physical therap\*" [tiab] OR "physiotherap\*" [tiab] OR "occupational therap\*" [tiab] OR "speech therap\*" [tiab] OR "language therap\*" [tiab] OR "speech and language therapist\*" [tiab] OR "allied health professionals"[tiab]) AND (interview\* OR "focus group\*" OR survey\* OR questionnaire\*)

*Filter: since 2022 June 22*

### **Cinahl on 2023 January 03**

(teleconsultation OR "tele-consultation" OR telehealth OR "tele-health" OR teleintervention OR "tele-intervention" OR telemedicine OR "tele-medicine" OR telerehabilitation OR "tele-rehabilitation" OR teletherapy OR "tele-therapy" OR telepractice OR "tele-practice" OR telecare OR "tele-care" OR "online-therapy" OR teleconf\* OR video-call\* OR video-conf\*) AND (barrier\* OR challenge\*) AND (Dieti\* OR nutritionist\* OR audiolog\* OR nurs\* OR midwi\* OR orthopt\* OR "physical therap\*" OR "physiotherap\*" OR "occupational therap\*" OR "speech therap\*" OR "language therap\*" OR "speech and language therapist\*" OR "allied health professionals") AND (interview\* OR "focus group\*" OR survey\* OR questionnaire\*)

*Filter: since 2022 June 22*
